# Supplementary material
Source: PubMed Central journal article supplement (PMC7966079)
Supplement: 2084_table.pdf [file 2084_table.pdf]

**On-line Table 1: Demographic data and treatment results**

|                                          | tPA Group    |             |              | Non-tPA Group  |              |                 |
|------------------------------------------|--------------|-------------|--------------|----------------|--------------|-----------------|
|                                          | D/P Mismatch | D/P Match   | Subtotal     | D/P Mismatch   | D/P Match    | Subtotal        |
| No. of patients                          | 23           | 6           | 29           | 24             | 10           | 34              |
| Age (yr)                                 | 54.7 ± 17.2  | 58.4 ± 11.7 | 57.4 ± 17.6  | 56.5 ± 21.6    | 57.7 ± 17.0  | 58.0 ± 13.5     |
| Sex                                      |              |             |              |                |              |                 |
| Male (%)                                 | 17 (73.9)    | 4 (66.7)    | 21 (72.4)    | 15 (62.5)      | 7 (70.0)     | 22 (64.7)       |
| Female (%)                               | 6 (20.1)     | 2 (33.3)    | 8 (27.6)     | 9 (37.5)       | 3 (30.0)     | 12 (35.3)       |
| Occlusion vessel (proximal/distal/other) |              |             |              |                |              |                 |
| ICA Rt.                                  | 4 (2/2)      | 5 (2/3)     | 9 (4/5)      | 2 (1/1)        | 1 (0/1)      | 3 (1/2)         |
| ICA Lt.                                  | 4 (4/0)      | 0           | 4 (4/0)      | 9 (5/4)        | 5 (2/3)      | 14 (7/7)        |
| MCA Rt.                                  | 11 (9/2)     | 1 (0/1)     | 12 (9/3)     | 7 (4/2/M2 = 1) | 3 (0/3)      | 10 (4/5/M2 = 1) |
| MCA Lt.                                  | 4 (4/0)      | 0           | 4 (4/0)      | 6 (2/2/M2 = 2) | 1 (0/1)      | 7 (2/3/M2 = 2)  |
| Time to angio (hr)                       | 5.0 ± 2.1    | 5.8 ± 3.2   | 5.2 ± 2.3    | 6.5 ± 2.4      | 7.2 ± 2.0    | 6.8 ± 2.3       |
| Thromolytics                             |              |             |              |                |              |                 |
| Urokinase                                |              |             |              |                |              |                 |
| Cases/dosage (K unit)                    | 23/390 ± 144 | 5/258 ± 168 | 28/364 ± 156 | 24/377 ± 130   | 10/390 ± 145 | 34/381 ± 133    |
| GP IIb/IIIa                              |              |             |              |                |              |                 |
| Cases/dosage (mg)                        | 18/4.5 ± 3.2 | 4/4.2 ± 4.0 | 22/4.4 ± 3.3 | 19/5.1 ± 3.3   | 9/6.2 ± 3.0  | 28/5.4 ± 3.2    |
| NIHSS score (median)                     |              |             |              |                |              |                 |
| At admission                             | 19           | 20          | 19           | 16             | 22           | 18              |
| At discharge                             | 4            | 13          | 5            | 4              | 8            | 4               |
| mRS at 90 days (%)                       |              |             |              |                |              |                 |
| Favorable (0–1)                          | 10 (43.5)    | 0 (0.0)     | 10 (34.5)    | 14 (53.3)      | 1 (10.0)     | 15 (44.1)       |
| Poor (2–5)                               | 13 (56.5)    | 5 (83.3)    | 18 (62.0)    | 10 (46.7)      | 5 (50.0)     | 15 (44.1)       |
| Mortality                                | 0 (0.0)      | 1 (16.7)    | 1 (3.5)      | 0 (0.0)        | 4 (40.0)     | 4 (11.8)        |
| Recanalization rate (%)                  | 78.3         | 83.3        | 79.3         | 66.7           | 30.0         | 55.9            |
| Complication rate (%)                    |              |             |              |                |              |                 |
| Major                                    |              |             |              |                |              |                 |
| Significant ICH                          | 4 (17.4)     | 2 (33.3)    | 6 (20.6)     | 0 (0.0)        | 4 (40.0)     | 4 (11.8)        |
| Massive edema                            | 1 (4.3)      | 2 (33.3)    | 3 (10.3)     | 1 (4.2)        | 5 (50.0)     | 5 (17.6)        |
| Reperfusion injury                       | 3 (13.0)     | 3 (50.0)    | 6 (20.6)     | 1 (4.2)        | 2 (20.0)     | 3 (8.8)         |
| Minor                                    |              |             |              |                |              |                 |
| Extravasation                            | 5 (21.7)     | 3 (50.0)    | 8 (27.6)     | 4 (16.7)       | 5 (50.0)     | 9 (26.5)        |
| Small ICH                                | 1 (4.3)      | 0 (0.0)     | 1 (3.4)      | 2 (8.3)        | 0 (0.0)      | 2 (5.9)         |
| Localized edema                          | 5 (26.1)     | 2 (33.3)    | 8 (8.8)      | 1 (4.2)        | 1 (10.0)     | 2 (5.9)         |
| Decompression surgery                    | 2 (8.7)      | 4 (66.7)    | 6 (20.6)     | 1 (4.2)        | 2 (20.0)     | 3 (8.8)         |

**Note:**—K unit = 1,000 units
